# Supplementary material for: Frailty and risk of microvascular complications in patients with type 2 diabetes: a population-based cohort study
Source: Springer Nature journal article supplement (doi:10.1186/s12916-022-02675-9), 2022-12-08
Supplement: MOESM1 [file 23803664]

## **Frailty and Risk of Microvascular Complications in Patients with Type 2**

### **Diabetes: A Population-Based Cohort Study**

#### **Supplementary online content**

**Figure S1.** Flow of participants in current study.

**Table S1.** The definitions for baseline diabetes.

**Table S2.** Definition of frailty phenotype and cutoff Points.

**Table S3.** Definition of diabetic microvascular complications.

**Table S4.** Definition of each component of a healthy diet score.

**Table S5.** Definition and list of long-term morbidities.

**Table S6.** Definition and list of Charlson Comorbidity Index.

**Table S7.** Baseline characteristics of 3678 patients with type 2 diabetes by number of diabetic microvascular complications.

**Table S8.** Association between frailty phenotype and risk of diabetic microvascular complications.

**Table S9.** Prevalence of frailty phenotype components in percentages.

**Table S10.** Association between frailty components and risk of diabetic microvascular complications.

**Table S11.** Association between frailty and risk of overall diabetic microvascular complications by subgroups.

**Table S12.** Sensitivity analyses of association between frailty phenotype and risk of overall diabetic microvascular complications (exclude individuals diagnosed any microvascular complications within 2 years of follow-up).

**Table S13.** Sensitivity analyses of association between frailty phenotype and risk of overall diabetic microvascular complications by sequentially adjusting for lipid profile, MAP, eGFR.

**Table S14.** Association between frailty phenotype and risk of overall diabetic microvascular complications using Fine & Gray models for competing risk.

**Table S15.** Sensitivity analyses of association between frailty phenotype and risk of diabetic microvascular complications were conducted by using the Charlson comorbidity index as an alternative measure of comorbidities.

**Table S16.** Mediating effects of multimorbidity on the association of frailty phenotype with risk of diabetic microvascular complications among type 2 diabetes.

**Fig. S1. Flow of participants in current study**

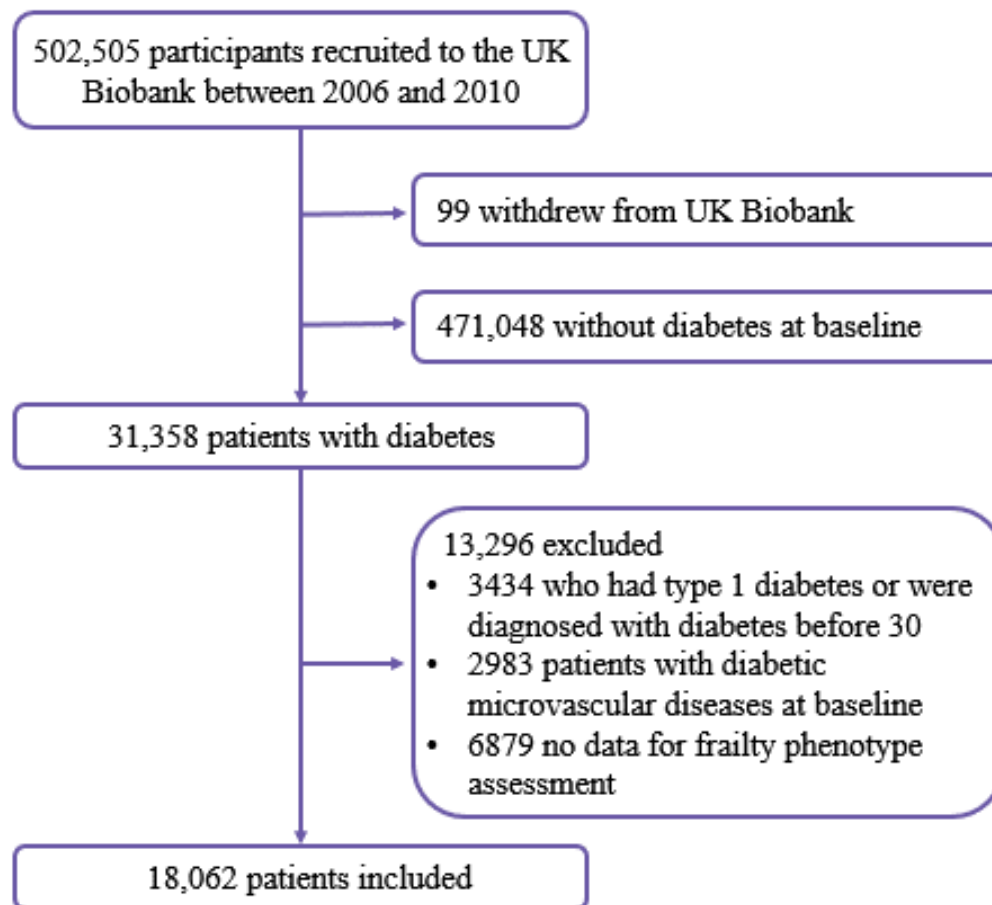

**Table S1. The definitions for baseline diabetes <sup>a</sup>.**

|                             | <b>ICD-9</b> | <b>ICD-10</b>         | <b>Self-reported<br/>field code</b>        | <b>Examination</b> |
|-----------------------------|--------------|-----------------------|--------------------------------------------|--------------------|
| <b>Diabetes at baseline</b> | 250          | E11, E12, E13,<br>E14 | 2443, 2976,<br>6153, 6177,<br>20002, 20003 | 30750              |

<sup>a</sup> Variable definitions constructed using ICD-9, ICD-10 as well as self-reported data fields with choice-, disease- or procedure-specific codes between brackets are shown.

Abbreviations: ICD, International Classification of Diseases

**Table S2. Definition of frailty phenotype and cutoff Points.**

| <b>Components</b>            | <b>Criteria</b>                                                                                                                                                                                                                                                                                                                                                                                                                                                                                                                                                                                                                                                                             | <b>Field IDs</b>                           |
|------------------------------|---------------------------------------------------------------------------------------------------------------------------------------------------------------------------------------------------------------------------------------------------------------------------------------------------------------------------------------------------------------------------------------------------------------------------------------------------------------------------------------------------------------------------------------------------------------------------------------------------------------------------------------------------------------------------------------------|--------------------------------------------|
| <b>Weight loss</b>           | Self-reported: “Compared with one year ago, has your weight changed?”<br>Response: yes, lost weight = 1; other = 0;<br>Do not know/Prefer not to answer = missing data.                                                                                                                                                                                                                                                                                                                                                                                                                                                                                                                     | 2306                                       |
| <b>Exhaustion</b>            | Self-reported: “Over the past two weeks, how often have you felt tired or had little energy?”<br>Response: more than half the days or nearly every day = 1; other = 0;<br>Do not know/Prefer not to answer = missing data.                                                                                                                                                                                                                                                                                                                                                                                                                                                                  | 2080                                       |
| <b>Low physical activity</b> | Quintiles of sex- and age-specific levels of total MET minutes per week derived from IPAQ.<br>The lowest 20% of total MET minutes per week = 1; other = 0;<br>No response/ Prefer not to answer = missing data.                                                                                                                                                                                                                                                                                                                                                                                                                                                                             | 31,<br>21022,<br>22037,<br>22038,<br>22039 |
| <b>Slow gait speed</b>       | Self-reported: “How would you describe your usual walking pace?”<br>Response: slow = 1; other = 0;<br>Do not know/Prefer not to answer = missing data.                                                                                                                                                                                                                                                                                                                                                                                                                                                                                                                                      | 924                                        |
| <b>Low grip strength</b>     | Measured grip strength expressed in kg by sex- and BMI- adjusted cut-off points.<br>Cut-off points:<br>Men<br>If BMI $\leq 24.0$ kg/m <sup>2</sup> & grip strength $\leq 29$ kg<br>If BMI 24.1 to 26.0 kg/m <sup>2</sup> & grip strength $\leq 30$ kg<br>If BMI 26.1 to 28.0 kg/m <sup>2</sup> & grip strength $\leq 30$ kg<br>If BMI $> 28.0$ kg/m <sup>2</sup> & grip strength $\leq 32$ kg<br>Women<br>If BMI $\leq 23.0$ kg/m <sup>2</sup> & grip strength $\leq 17$ kg<br>If BMI 23.1 to 26.0 kg/m <sup>2</sup> & grip strength $\leq 17.3$ kg<br>If BMI 26.1 to 29.0 kg/m <sup>2</sup> & grip strength $\leq 18$ kg<br>If BMI $> 29.0$ kg/m <sup>2</sup> & grip strength $\leq 21$ kg | 31,<br>21001,<br>46, 47                    |

**Table S3. Definition of diabetic microvascular complications <sup>a</sup>.**

|                    | <b>ICD-9</b> | <b>ICD-10</b>                                                                                     | <b>Self-reported field IDs</b> |
|--------------------|--------------|---------------------------------------------------------------------------------------------------|--------------------------------|
| <b>Nephropathy</b> | 2503         | E112, E122, E132, E142,<br>N083, N180, N181, N182,<br>N183, N184, N185, N186,<br>N187, N188, N189 | 20002 (1607)                   |
| <b>Retinopathy</b> | 2504         | E113, E123, E133, E143,<br>H280, H360                                                             | 6148, 20002<br>(1276)          |
| <b>Neuropathy</b>  | 2505         | E114, E124, E134, E144,<br>G590, G629, G632, G990                                                 | 20002 (1468)                   |

<sup>a</sup> Variable definitions constructed using ICD-9, ICD-10 as well as self-reported data fields with choice-, disease- or procedure-specific codes between brackets are shown.

Abbreviations: ICD, International Classification of Diseases

**Table S4. Definition of each component of a healthy diet score <sup>a</sup>.**

|                                            | <b>Goal (1 point)</b> | <b>One serving equals to</b>                                                                                                                                                                                                  | <b>Field IDs</b>          |
|--------------------------------------------|-----------------------|-------------------------------------------------------------------------------------------------------------------------------------------------------------------------------------------------------------------------------|---------------------------|
| <b>Fruits</b>                              | ≥ 3 servings/day      | 1 piece of fresh fruit<br>5 pieces of dried fruit                                                                                                                                                                             | 1309, 1319                |
| <b>Vegetables<br/>(excluding potatoes)</b> | ≥ 3 servings/day      | 3 heaped tablespoons                                                                                                                                                                                                          | 1289, 1299                |
| <b>Whole grains</b>                        | ≥ 3 servings/day      | 1 slice of whole-grain bread<br>1 cup of whole-grain cereal                                                                                                                                                                   | 1438, 1448,<br>1458, 1468 |
| <b>Vegetable oil</b>                       | ≥ 2 servings/day      | Vegetable oil based spread<br>(Flora Pro-Active/Benecol,<br>Soft (tub) margarine, Olive<br>oil based spread, or<br>Polyunsaturated/sunflower<br>oil based spread) in<br>combination with eating at<br>least 2 slices of bread | 1428, 2654,<br>1438       |
| <b>Fish</b>                                | ≥ 2 servings/week     | Once/week                                                                                                                                                                                                                     | 1329, 1339                |
| <b>Dairy</b>                               | ≥ 2 servings/day      | 1 cup/day if consumption<br>any type of milk<br>1 piece of cheese                                                                                                                                                             | 1408, 1418                |
| <b>Refined grains</b>                      | ≤ 2 servings/day      | 1 slice of bread or 1 bowl<br>of cereal                                                                                                                                                                                       | 1438, 1448,<br>1458, 1468 |
| <b>Unprocessed meats</b>                   | ≤ 2 servings/week     | Once/week (including<br>poultry, beef, lamb, and<br>pork)                                                                                                                                                                     | 1359, 1369,<br>1379, 1389 |
| <b>Processed meats</b>                     | ≤ 1 servings/week     | Once/week                                                                                                                                                                                                                     | 1349                      |
| <b>Sugar-sweetened<br/>beverages</b>       | Don't drink           | Only 0 serving was<br>possible here                                                                                                                                                                                           | 6144                      |

<sup>a</sup> Field IDs and serving sizes used per diet component in UK Biobank with available data from the general baseline questionnaire. If participants achieved the intake goal they were considered to have an adequate intake of the diet component. Adequate intake of at least half of all diet components was considered as an ideal diet, less than half was considered a poor diet.

**Table S5. Definition and list of long-term morbidities.**

|           | <b>Morbidity grouping*</b>         | <b>Conditions included</b>                 | <b>Code</b> |
|-----------|------------------------------------|--------------------------------------------|-------------|
| <b>1</b>  | <b>Hypertension</b>                | Hypertension                               | 1065        |
|           |                                    | Essential hypertension                     | 1072        |
| <b>2</b>  | <b>Coronary heart disease</b>      | Heart attack/MI                            | 1075        |
|           |                                    | Angina                                     | 1074        |
| <b>3</b>  | <b>Diabetes</b>                    | Diabetic nephropathy                       | 1607        |
|           |                                    | Diabetic neuropathy/ulcers                 | 1468        |
|           |                                    | Diabetes                                   | 1220        |
|           |                                    | Type 1 diabetes                            | 1222        |
|           |                                    | Type 2 diabetes                            | 1223        |
|           |                                    | Diabetic eye disease                       | 1276        |
| <b>4</b>  | <b>Stroke/TIA</b>                  | Stroke                                     | 1081        |
|           |                                    | TIA                                        | 1082        |
|           |                                    | Subarachnoid haemorrhage                   | 1086        |
|           |                                    | Brain haemorrhage                          | 1491        |
|           |                                    | Ischaemic stroke                           | 1583        |
| <b>5</b>  | <b>Atrial fibrillation</b>         | Atrial fibrillation                        | 1471        |
| <b>6</b>  | <b>Heart failure</b>               | Cardiomyopathy                             | 1079        |
|           |                                    | Hypertrophic cardiomyopathy                | 1588        |
|           |                                    | Heart failure/pulmonary oedema             | 1076        |
| <b>7</b>  | <b>Peripheral vascular disease</b> | Peripheral vascular disease                | 1067        |
|           |                                    | Leg claudication/intermittent claudication | 1087        |
| <b>8</b>  | <b>COPD</b>                        | COPD/Chronic obstructive pulmonary disease | 1112        |
|           |                                    | Emphysema/Chronic bronchitis               | 1113        |
|           |                                    | Emphysema                                  | 1472        |
| <b>9</b>  | <b>Asthma</b>                      | Asthma                                     | 1111        |
| <b>10</b> | <b>Bronchiectasis</b>              | Bronchiectasis                             | 1114        |
| <b>11</b> | <b>Cancer*</b>                     | “yes”/“no” to “have you ever had cancer?”  |             |
| <b>12</b> | <b>Dyspepsia</b>                   | Gastro-oesophageal reflux (GORD)           | 1138        |
|           |                                    | Oesophagitis/Barrett’s oesophagus          | 1139        |
|           |                                    | Gastric stomach ulcers                     | 1142        |
|           |                                    | Gastric erosions/gastritis                 | 1143        |
|           |                                    | Duodenal ulcer                             | 1457        |
|           |                                    | Dyspepsia/indigestion                      | 1510        |
|           |                                    | Hiatus hernia                              | 1474        |
|           |                                    | Helicobacter pylori                        | 1442        |



|           |                                                 |                                     |       |
|-----------|-------------------------------------------------|-------------------------------------|-------|
| <b>13</b> | <b>Diverticular disease</b>                     | Diverticular disease/diverticulitis | 1458  |
| <b>14</b> | <b>Irritable bowel syndrome</b>                 | Irritable bowel syndrome            | 1154  |
| <b>15</b> | <b>Chronic liver disease</b>                    | Oesophageal varices                 | 1141  |
|           |                                                 | Non infective hepatitis             | 1157  |
|           |                                                 | Liver failure/cirrhosis             | 1158  |
|           |                                                 | Primary biliary cirrhosis           | 1506  |
| <b>16</b> | <b>Inflammatory bowel disease</b>               | Inflammatory bowel disease          | 1461  |
|           |                                                 | Crohn's disease                     | 1462  |
|           |                                                 | Ulcerative colitis                  | 1463  |
| <b>17</b> | <b>Constipation</b>                             | Constipation                        | 1599  |
| <b>18</b> | <b>Viral hepatitis</b>                          | Hepatitis B                         | 1579  |
|           |                                                 | Hepatitis C                         | 1580  |
|           |                                                 | Hepatitis D                         | 1581  |
| <b>19</b> | <b>Depression</b>                               | Depression                          | 1286  |
|           |                                                 | Postnatal depression                | 1531  |
| <b>20</b> | <b>Anxiety</b>                                  | Anxiety/panic attacks               | 1287  |
|           |                                                 | Nervous breakdown                   | 1288  |
|           |                                                 | Post-traumatic stress disorder      | 1469  |
|           |                                                 | Obsessive compulsive disorder       | 1615  |
|           |                                                 | Stress                              | 1614  |
|           |                                                 | Insomnia                            | 1616  |
| <b>21</b> | <b>Schizophrenia/Bipolar affective disorder</b> | Scizophrenia                        | 1289  |
|           |                                                 | <b>Bipolar</b>                      | Mania |
|           |                                                 | Bipolar disorder                    | 1291  |
|           |                                                 | Manic depression                    | 1291  |
| <b>22</b> | <b>Connective tissue diseases</b>               | Myositis/myopathy                   | 1322  |
|           |                                                 | Systemic lupus erythematosus/SLE    | 1381  |
|           |                                                 | Connective tissue disorder          | 1373  |
|           |                                                 | Sjogren's syndrome.sicca syndrome   | 1382  |
|           |                                                 | Dermatopolymyositis                 | 1383  |
|           |                                                 | Scloeroderma/systemic sclerosis     | 1384  |
|           |                                                 | Rheumatoid arthritis                | 1464  |
|           |                                                 | Psoriatic arthropathy               | 1477  |
|           |                                                 | Dermatomyositis                     | 1480  |
|           |                                                 | Polymyositis                        | 1481  |
|           |                                                 | Polymyalgia rheumatica              | 1377  |
| <b>23</b> | <b>Painful conditions</b>                       | Back pain                           | 1534  |
|           |                                                 | Joint pain                          | 1537  |

|           |                               |                                             |      |
|-----------|-------------------------------|---------------------------------------------|------|
|           |                               | Headaches (not migraine)                    | 1436 |
|           |                               | Sciatica                                    | 1476 |
|           |                               | Plantar fasciitis                           | 1540 |
|           |                               | Carpal tunnel syndrome                      | 1541 |
|           |                               | Fibromyalgia                                | 1542 |
|           |                               | Arthritis                                   | 1538 |
|           |                               | Shingles                                    | 1573 |
|           |                               | Disc problem                                | 1532 |
|           |                               | Prolapsed disc/slipped disc                 | 1312 |
|           |                               | Spine arthritis/spondylitis                 | 1311 |
|           |                               | Ankylosing spondylitis                      | 1313 |
|           |                               | Back problem                                | 1294 |
|           |                               | Osteoarthritis                              | 1465 |
|           |                               | Gout                                        | 1466 |
|           |                               | Cervical spondylosis                        | 1478 |
|           |                               | Trigeminal neuralgia                        | 1523 |
|           |                               | Disc degeneration                           | 1533 |
|           |                               | Trapped nerve/compressed nerve              | 1257 |
| <b>24</b> | <b>Osteoporosis</b>           | Osteoporosis                                | 1309 |
| <b>25</b> | <b>Thyroid disorders</b>      | Thyroid problem (not cancer)                | 1224 |
|           |                               | Hyperthyroidism/thyrotoxicosis              | 1225 |
|           |                               | Hypothyroidism/myxoedema                    | 1226 |
|           |                               | Grave's disease                             | 1522 |
|           |                               | Thyroid goitre                              | 1610 |
|           |                               | Thyroiditis                                 | 1428 |
| <b>26</b> | <b>Alcohol problems</b>       | Alcohol dependency                          | 1408 |
|           |                               | Alcoholic liver disease/alcoholic cirrhosis | 1604 |
| <b>27</b> | <b>Chronic kidney disease</b> | Polycystic kidney                           | 1427 |
|           |                               | Diabetic nephropathy                        | 1607 |
|           |                               | Renal/kidney failure                        | 1192 |
|           |                               | Renal failure requiring dialysis            | 1193 |
|           |                               | Renal failure not requiring dialysis        | 1194 |
|           |                               | Kidney nephropathy                          | 1519 |
|           |                               | Immunoglobulin A (IgA) nephropathy          | 1520 |
| <b>28</b> | <b>Prostate disorders</b>     | Prostate problem (not cancer)               | 1207 |
|           |                               | Enlarged prostate                           | 1396 |
|           |                               | Benign prostatic hypertrophy                | 1516 |
| <b>29</b> | <b>Glaucoma</b>               | Glaucoma                                    | 1277 |
| <b>30</b> | <b>Epilepsy</b>               | Epilepsy                                    | 1264 |

|           |                                 |                                         |      |
|-----------|---------------------------------|-----------------------------------------|------|
| <b>31</b> | <b>Dementia</b>                 | Dementia/Alzheimer/cognitive impairment | 1263 |
| <b>32</b> | <b>Psoriasis or eczema</b>      | Eczema/dermatitis                       | 1452 |
|           |                                 | Psoriasis                               | 1453 |
| <b>33</b> | <b>Migraine</b>                 | Migraine                                | 1265 |
| <b>34</b> | <b>Chronic sinusitis</b>        | Chronic sinusitis                       | 1416 |
| <b>35</b> | <b>Anorexia or bulimia</b>      | Anorexia, bulimia/other eating disorder | 1470 |
| <b>36</b> | <b>Parkinson's disease</b>      | Parkinson's disease                     | 1262 |
| <b>37</b> | <b>Multiple sclerosis</b>       | Multiple sclerosis                      | 1261 |
| <b>38</b> | <b>Chronic fatigue syndrome</b> | Chronic fatigue syndrome                | 1482 |
| <b>39</b> | <b>Endometriosis</b>            | Endometriosis                           | 1402 |
| <b>40</b> | <b>Meniere disease</b>          | Meniere disease                         | 1421 |
| <b>41</b> | <b>Pernicious anaemia</b>       | Pernicious anaemia                      | 1331 |
| <b>42</b> | <b>Polycystic ovaries</b>       | Polycystic ovaries                      | 1350 |

\*Self-report lifetime diagnosis by doctor recorded by interview (UK Biobank data field ID: 20002), except cancer diagnosis which was reported by touch-screen questionnaire. The list of disease groupings was based on Barnett et al (2012). In the present study, we did not include patients with diabetes at baseline.

**Table S6. Definition and list of Charlson Comorbidity Index <sup>a</sup>.**

|   | <b>Comorbidities</b>      | <b>Weight</b> | <b>ICD-9</b>                                                                                                                                                                                                                                              | <b>ICD-10</b>                                                                                                                                                                                                                                                                                                  | <b>Self-reported fields and doctor-diagnosis fields</b>               |
|---|---------------------------|---------------|-----------------------------------------------------------------------------------------------------------------------------------------------------------------------------------------------------------------------------------------------------------|----------------------------------------------------------------------------------------------------------------------------------------------------------------------------------------------------------------------------------------------------------------------------------------------------------------|-----------------------------------------------------------------------|
| 1 | Congestive heart failure  | 2             | 410, 4109, 411, 4119, 412, 4129, 413, 4139, 414, 4140, 4141, 4148, 4149                                                                                                                                                                                   | I20, I200, I201, I208, I209, I21, I210, I211, I212, I213, I214, I219, I21X, I22, I220, I221, I228, I229, I23, I230, I231, I232, I233, I234, I235, I236, I238, I24, I240, I241, I248, I249, I25, I250, I251, I252, I253, I254, I255, I256, I258, I259                                                           | 6150<br>20004 (1069, 1070, 1071, 1095, 1523)<br>20002 (1075)<br>41272 |
| 2 | Dementia                  | 2             | 3310, 3311                                                                                                                                                                                                                                                | F00, F000, F001, F002, F009, G30, G300, G301, G308, G309, F01, F010, F011, F012, F013, F018, F019, I673, F020, G310                                                                                                                                                                                            | 20002 (1263)                                                          |
| 3 | Chronic pulmonary disease | 1             | 4168, 4169, 4909, 4910, 4911, 4912, 4918, 4919, 4929, 4949, 4950, 4951, 4952, 4953, 4954, 4955, 4956, 4957, 4958, 4959, 4969, 5009, 5019, 5029, 5039, 5049, 5059                                                                                          | I278, I279, J40, J410, J411, J418, J42, J430, J431, J432, J438, J439, J440, J441, J448, J449, J450, J451, J458, J459, J46, J47, J60, J61, J620, J628, J630, J631, J632, J633, J634, J635, J638, J64, J65, J660, J661, J662, J668, J670, J671, J672, J673, J674, J675, J676, J677, J678, J679, J684, J701, J703 | 20002<br>(1112,1113,1114,1115,1472,1121)<br>6152, 3992                |
| 4 | Rheumatologic disease     | 1             | 4465, 7100, 7101, 7102, 7103, 7104, 7140, 71400, 71401, 71402, 71403, 71404, 71405, 71406, 71407, 71408, 71409, 7141, 71410, 71411, 71412, 71413, 71414, 71415, 71416, 71417, 71418, 71419, 7142, 71420, 71421, 71422, 71423, 71424, 71425, 71426, 71427, | M0500, M0501, M0502, M0503, M0504, M0505, M0506, M0507, M0508, M0509, M0510, M0511, M0512, M0513, M0514, M0515, M0516, M0517, M0518, M0519, M0520, M0521, M0522, M0523, M0524, M0525, M0526, M0527, M0528, M0529, M0530, M0531, M0532, M0533, M0534, M0535, M0536, M0537, M0538, M0539, M0580, M0581,          | 20002 (1377,1464)                                                     |

|   |                                     |   |                                                                                                                  |                                                                                                                                                                                                                                                                                                                                                                                                                                                                                                                                                                                                                                                                                                                 |                                                                          |
|---|-------------------------------------|---|------------------------------------------------------------------------------------------------------------------|-----------------------------------------------------------------------------------------------------------------------------------------------------------------------------------------------------------------------------------------------------------------------------------------------------------------------------------------------------------------------------------------------------------------------------------------------------------------------------------------------------------------------------------------------------------------------------------------------------------------------------------------------------------------------------------------------------------------|--------------------------------------------------------------------------|
|   |                                     |   | 71428, 71429, 72590, 72591, 72592, 72593, 72594, 72595, 72596, 72597, 72598, 72599                               | M0582, M0583, M0584, M0585, M0586, M0587, M0588, M0589, M0590, M0591, M0592, M0593, M0594, M0595, M0596, M0597, M0598, M0599, M0600, M0601, M0602, M0603, M0604, M0605, M0606, M0607, M0608, M0609, M0610, M0611, M0612, M0613, M0614, M0615, M0616, M0617, M0618, M0619, M0620, M0621, M0622, M0623, M0624, M0625, M0626, M0627, M0628, M0629, M0630, M0631, M0632, M0633, M0634, M0635, M0636, M0637, M0638, M0639, M0640, M0641, M0642, M0643, M0644, M0645, M0646, M0647, M0648, M0649, M0680, M0681, M0682, M0683, M0684, M0685, M0686, M0687, M0688, M0689, M0690, M0691, M0692, M0693, M0694, M0695, M0696, M0697, M0698, M0699, M320, M321, M328, M3290, M330, M331, M332, M339, M315, M351, M353, M360 |                                                                          |
| 5 | Mild liver disease                  | 2 | 702, 703, 704, 705, 706, 709, 5709, 5710, 5711, 5712, 5713, 5714, 5716, 5718, 5719, 5733, 5734, 5738, 5739, V427 | B180, B181, B182, B188, B189, K700, K701, K702, K703, K709, K713, K714, K715, K717, K730, K731, K732, K738, K739, K740, K741, K742, K743, K744, K745, K746, K760, K762, K763, K764, K768, K769, Z944                                                                                                                                                                                                                                                                                                                                                                                                                                                                                                            | 20002 (1136, 1155, 1156, 1157, 1506, 1578, 1579, 1580, 1581, 1582, 1604) |
| 6 | Diabetes with chronic complications | 1 | 2504, 2505, 2506, 2507                                                                                           | E102, E103, E104, E105, E107, E112, E113, E114, E115, E117, E122, E123, E124, E125, E127, E132, E133, E134, E135, E137, E142, E143, E144, E145, E147                                                                                                                                                                                                                                                                                                                                                                                                                                                                                                                                                            | 6148, 20002 (1276)                                                       |

|   |                                                 |   |                                                                                                                                                                                                                                                                                                                                                                                                                                                                                                                                                                                                                                                                                                                                                                                                                               |                                                                                                                                                                                                                                                                                                                                                                                                                                                                                                                                                                                                                                                                                                                                                                                                                                                       |                                                                                                                                                                                                                                                                                                                                                                                                                                                                                             |
|---|-------------------------------------------------|---|-------------------------------------------------------------------------------------------------------------------------------------------------------------------------------------------------------------------------------------------------------------------------------------------------------------------------------------------------------------------------------------------------------------------------------------------------------------------------------------------------------------------------------------------------------------------------------------------------------------------------------------------------------------------------------------------------------------------------------------------------------------------------------------------------------------------------------|-------------------------------------------------------------------------------------------------------------------------------------------------------------------------------------------------------------------------------------------------------------------------------------------------------------------------------------------------------------------------------------------------------------------------------------------------------------------------------------------------------------------------------------------------------------------------------------------------------------------------------------------------------------------------------------------------------------------------------------------------------------------------------------------------------------------------------------------------------|---------------------------------------------------------------------------------------------------------------------------------------------------------------------------------------------------------------------------------------------------------------------------------------------------------------------------------------------------------------------------------------------------------------------------------------------------------------------------------------------|
| 7 | Hemiplegia or paraplegia                        | 2 | 3341, 3420, 3421, 3429, 34300, 34301, 3431, 3432, 3433, 3434, 3438, 3439, 3440, 3441, 3442, 3443, 3444, 3445, 3446, 3449                                                                                                                                                                                                                                                                                                                                                                                                                                                                                                                                                                                                                                                                                                      | G041, G114, G801, G802, G810, G811, G819, G820, G821, G822, G823, G824, G825, G830, G831, G832, G833, G834, G839                                                                                                                                                                                                                                                                                                                                                                                                                                                                                                                                                                                                                                                                                                                                      | 20002 (1252)                                                                                                                                                                                                                                                                                                                                                                                                                                                                                |
| 8 | Renal disease                                   | 1 | 4030, 4031, 4039, 4040, 4041, 4049, 5820, 5821, 5822, 5824, 5828, 5829, 5830, 5831, 5832, 5834, 5836, 5837, 5859, 5869, 5880, V420, V451, V560, V568                                                                                                                                                                                                                                                                                                                                                                                                                                                                                                                                                                                                                                                                          | I120, I131, N032, N033, N034, N035, N036, N037, N052, N053, N054, N055, N056, N057, N180, N181, N182, N183, N184, N185, N188, N189, N19, N250, Z490, Z491, Z492, Z940, Z992                                                                                                                                                                                                                                                                                                                                                                                                                                                                                                                                                                                                                                                                           | 20002 (1405,1192,1193,1194)<br>131291                                                                                                                                                                                                                                                                                                                                                                                                                                                       |
| 9 | Any malignancy, including leukemia and lymphoma | 2 | 1400, 1401, 1403, 1404, 1405, 1406, 1408, 1409, 1410, 1411, 1412, 1413, 1414, 1415, 1416, 1418, 1419, 1420, 1421, 1422, 1428, 1429, 1430, 1431, 1438, 1439, 1440, 1441, 1448, 1449, 1450, 1451, 1452, 1453, 1454, 1455, 1456, 1458, 1459, 1460, 1461, 1462, 1463, 1464, 1465, 1466, 1467, 1468, 1469, 1470, 1471, 1472, 1473, 1478, 1479, 1480, 1481, 1482, 1483, 1488, 1489, 1490, 1490, 1491, 1491, 1492, 1493, 1494, 1495, 1498, 1499, 1499, 1500, 1501, 1502, 1503, 1504, 1505, 1508, 1509, 1510, 1510, 1511, 1511, 1512, 1512, 1513, 1513, 1514, 1514, 1515, 1515, 1516, 1518, 1519, 1519, 1520, 1520, 1521, 1521, 1522, 1522, 1523, 1523, 1524, 1525, 1528, 1529, 1529, 1530, 1531, 1532, 1533, 1534, 1535, 1536, 1537, 1538, 1539, 1540, 1541, 1542, 1543, 1548, 1550, 1551, 1552, 1560, 1561, 1562, 1568, 1569, 1570, | C000, C001, C002, C003, C004, C005, C006, C008, C009, C01, C020, C021, C022, C023, C024, C028, C029, C030, C031, C039, C040, C041, C048, C049, C050, C051, C052, C058, C059, C060, C061, C062, C068, C069, C07, C080, C081, C088, C089, C090, C091, C098, C099, C100, C101, C102, C103, C104, C108, C109, C110, C111, C112, C113, C118, C119, C12, C130, C131, C132, C138, C139, C140, C142, C148, C150, C151, C152, C153, C154, C155, C158, C159, C160, C161, C162, C163, C164, C165, C166, C168, C169, C170, C171, C172, C173, C178, C179, C180, C181, C182, C183, C184, C185, C186, C187, C188, C189, C19, C20, C210, C211, C212, C218, C220, C221, C222, C223, C224, C227, C229, C23, C240, C241, C248, C249, C250, C251, C252, C253, C254, C257, C258, C259, C260, C261, C268, C269, C300, C301, C310, C311, C312, C313, C318, C319, C320, C321, | 20001 (1001, 1002, 1004, 1005, 1006, 1007, 1008, 1009, 1010, 1011, 1012, 1015, 1016, 1017, 1018, 1019, 1020, 1021, 1022, 1023, 1024, 1025, 1026, 1027, 1028, 1029, 1030, 1031, 1032, 1033, 1034, 1035, 1036, 1037, 1038, 1039, 1040, 1041, 1042, 1043, 1044, 1045, 1046, 1047, 1048, 1050, 1051, 1052, 1053, 1055, 1056, 1058, 1061, 1062, 1063, 1064, 1065, 1066, 1067, 1068, 1070, 1072, 1073, 1074, 1075, 1076, 1077, 1078, 1079, 1080, 1081, 1082, 1084, 1085, 1086, 1087, 1088, 99999) |

1570, 1571, 1571, 1572, 1572, 1573, 1573,  
1574, 1574, 1575, 1578, 1579, 1579, 1580,  
1580, 1581, 1582, 1583, 1584, 1585, 1588,  
1589, 1589, 1590, 1590, 1591, 1591, 1592,  
1593, 1594, 1595, 1598, 1599, 1599, 1600,  
1600, 1601, 1601, 1602, 1602, 1603, 1603,  
1604, 1604, 1605, 1605, 1608, 1609, 1609,  
1610, 1610, 1611, 1611, 1612, 1612, 1613,  
1613, 1614, 1615, 1618, 1619, 1619, 1620,  
1622, 1623, 1624, 1625, 1628, 1629, 1630,  
1630, 1631, 1631, 1632, 1633, 1634, 1635,  
1638, 1639, 1639, 1640, 1640, 1641, 1641,  
1642, 1642, 1643, 1643, 1644, 1645, 1648,  
1649, 1649, 1650, 1658, 1659, 1690, 1690,  
1691, 1691, 1692, 1692, 1693, 1693, 1694,  
1695, 1699, 1699, 1700, 1700, 1701, 1701,  
1702, 1702, 1703, 1703, 1704, 1704, 1705,  
1705, 1706, 1707, 1708, 1709, 1709, 1710,  
1710, 1711, 1712, 1712, 1713, 1713, 1714,  
1714, 1715, 1715, 1716, 1717, 1718, 1719,  
1719, 1720, 1720, 1721, 1721, 1722, 1722,  
1723, 1723, 1724, 1724, 1725, 1725, 1726,  
1727, 1728, 1729, 1729, 1740, 1740, 1741,  
1741, 1742, 1742, 1743, 1743, 1744, 1744,  
1745, 1745, 1746, 1748, 1749, 1749, 1750,  
1751, 1752, 1753, 1754, 1755, 1759, 1759,

C322, C323, C328, C329, C33, C340, C341, C342,  
C343, C348, C349, C37, C380, C381, C382, C383,  
C384, C388, C390, C398, C399, C400, C401,  
C402, C403, C408, C409, C410, C411, C412,  
C413, C414, C418, C419, C430, C431, C432,  
C433, C434, C435, C436, C437, C438, C439,  
C450, C451, C452, C457, C459, C460, C461,  
C462, C463, C467, C468, C469, C470, C471,  
C472, C473, C474, C475, C476, C478, C479,  
C480, C481, C482, C488, C490, C491, C492,  
C493, C494, C495, C496, C498, C499, C500,  
C501, C502, C503, C504, C505, C506, C508,  
C509, C510, C511, C512, C518, C519, C52, C530,  
C531, C538, C539, C540, C541, C542, C543,  
C548, C549, C55, C56, C570, C571, C572, C573,  
C574, C577, C578, C579, C58, C600, C601, C602,  
C608, C609, C61, C620, C621, C629, C630, C631,  
C632, C637, C638, C639, C64, C65, C66, C670,  
C671, C672, C673, C674, C675, C676, C677,  
C678, C679, C680, C681, C688, C689, C690,  
C691, C692, C693, C694, C695, C696, C698,  
C699, C700, C701, C709, C710, C711, C712,  
C713, C714, C715, C716, C717, C718, C719,  
C720, C721, C722, C723, C724, C725, C728,  
C729, C73, C740, C741, C749, C750, C751, C752,  
C753, C754, C755, C758, C759, C760, C761,

1770, 1771, 1772, 1773, 1774, 1775, 1779,  
1780, 1781, 1782, 1783, 1784, 1785, 1789,  
1799, 1800, 1800, 1801, 1801, 1802, 1803,  
1804, 1805, 1808, 1809, 1809, 1819, 1820,  
1821, 1828, 1830, 1832, 1833, 1834, 1835,  
1838, 1839, 1840, 1841, 1842, 1843, 1844,  
1848, 1849, 1859, 1860, 1869, 1871, 1872,  
1873, 1874, 1875, 1876, 1877, 1878, 1879,  
1880, 1880, 1881, 1881, 1882, 1882, 1883,  
1883, 1884, 1884, 1885, 1885, 1886, 1887,  
1888, 1889, 1889, 1890, 1890, 1891, 1891,  
1892, 1892, 1893, 1893, 1894, 1894, 1895,  
1898, 1899, 1899, 1900, 1901, 1902, 1903,  
1904, 1905, 1906, 1907, 1908, 1909, 1910,  
1911, 1912, 1913, 1914, 1915, 1916, 1917,  
1918, 1919, 1920, 1921, 1922, 1923, 1928,  
1929, 1939, 1940, 1941, 1943, 1944, 1945,  
1946, 1948, 1949, 1950, 1951, 1952, 1953,  
1954, 1955, 1958, 2000, 2001, 2002, 2008,  
2010, 2011, 2012, 2014, 2015, 2016, 2017,  
2019, 2020, 2021, 2022, 2023, 2024, 2025,  
2026, 2028, 2029, 2030, 2031, 2038, 2040,  
2041, 2042, 2048, 2049, 2050, 2051, 2052,  
2053, 2058, 2059, 2060, 2061, 2062, 2068,  
2069, 2070, 2071, 2072, 2078, 2080, 2081,  
2082, 2088, 2089, 2386

C762, C763, C764, C765, C767, C768, C810,  
C811, C812, C813, C814, C817, C819, C820,  
C821, C822, C823, C824, C825, C826, C827,  
C829, C830, C831, C832, C833, C834, C835,  
C836, C837, C838, C839, C840, C841, C842,  
C843, C844, C845, C846, C847, C848, C849,  
C850, C851, C852, C857, C859, C880, C881,  
C882, C883, C884, C887, C889, C900, C901,  
C902, C903, C910, C911, C912, C913, C914,  
C915, C916, C917, C918, C919, C920, C921,  
C922, C923, C924, C925, C926, C927, C928,  
C929, C930, C931, C932, C933, C937, C939,  
C940, C941, C942, C943, C944, C945, C946,  
C947, C950, C951, C952, C957, C959, C960,  
C961, C962, C963, C964, C965, C966, C967,  
C968, C969, C97



|    |                                  |   |                                                                                                                                                                        |                                                                                                                                                                              |                   |
|----|----------------------------------|---|------------------------------------------------------------------------------------------------------------------------------------------------------------------------|------------------------------------------------------------------------------------------------------------------------------------------------------------------------------|-------------------|
| 10 | Moderate or severe liver disease | 4 | 4560, 4561, 4562, 5722, 5723, 5724, 5728                                                                                                                               | I850, I859, I864, I982, K704, K711, K721, K729, K765, K766, K767                                                                                                             | 20002 (1141,1158) |
| 11 | Metastatic solid tumor           | 6 | 1960, 1961, 1962, 1963, 1965, 1966, 1968, 1969, 1970, 1971, 1972, 1973, 1974, 1975, 1976, 1977, 1978, 1980, 1981, 1982, 1983, 1984, 1985, 1986, 1987, 1988, 1990, 1991 | C770, C771, C772, C773, C774, C775, C778, C779, C780, C781, C782, C783, C784, C785, C786, C787, C788, C790, C791, C792, C793, C794, C795, C796, C797, C798, C799, C800, C809 | 20001 (1071)      |
| 12 | AIDS/HIV                         | 4 | 042, 043, 044, 27917                                                                                                                                                   | B200, B201, B202, B203, B204, B205, B206, B207, B208, B209, B210, B211, B212, B213, B217, B218, B219, B220, B221, B222, B227, B24                                            | 20002 (1439)      |

<sup>a</sup> The Charlson comorbidity index consists of 12 comorbidities and a total index ranging from 0 to 24.

**Table S7. Baseline characteristics of 3678 patients with type 2 diabetes by number of diabetic microvascular complications <sup>a</sup>.**

| Variables                                | Overall            | Number of diabetic microvascular complications |                    |                    | P value |
|------------------------------------------|--------------------|------------------------------------------------|--------------------|--------------------|---------|
|                                          |                    | One                                            | Two                | Three              |         |
| Number of participants                   | 3678               | 3036                                           | 556                | 86                 |         |
| Age, mean (SD), years                    | 61.7 (6.2)         | 61.7 (6.1)                                     | 61.8 (6.4)         | 59.9 (6.7)         | 0.019   |
| BMI, mean (SD), kg/m <sup>2</sup>        | 32.2 (5.8)         | 32.1 (5.8)                                     | 32.7 (5.8)         | 32.6 (5.9)         | 0.039   |
| Male, n (%)                              | 2382 (64.8%)       | 1939 (63.9%)                                   | 380 (68.3%)        | 63 (73.3%)         | 0.032   |
| White ethnicity, n (%)                   | 3299 (89.7%)       | 2724 (89.7%)                                   | 499 (89.7%)        | 76 (88.4%)         | 0.206   |
| Townsend deprivation index, median (IQR) | -1.3 (-3.2 to 1.9) | -1.4 (-3.3 to 1.8)                             | -0.9 (-3.0 to 2.1) | -0.6 (-2.6 to 2.3) | 0.013   |
| Education, n (%)                         |                    |                                                |                    |                    | 0.054   |
| College or university                    | 843 (22.9%)        | 706 (23.3%)                                    | 119 (21.4%)        | 18 (20.9%)         |         |
| Vocational                               | 590 (16.0%)        | 467 (15.4%)                                    | 113 (20.3%)        | 10 (11.6%)         |         |
| Upper secondary                          | 322 (8.8%)         | 266 (8.8%)                                     | 45 (8.1%)          | 11 (12.8%)         |         |
| Lower secondary                          | 866 (23.5%)        | 733 (24.1%)                                    | 112 (20.1%)        | 21 (24.4%)         |         |
| Others                                   | 1019 (27.7%)       | 829 (27.3%)                                    | 165 (29.7%)        | 25 (29.1%)         |         |
| Unknown                                  | 38 (1.0%)          | 35 (1.2%)                                      | 2 (0.4%)           | 1 (1.2%)           |         |
| Annual Household income, n (%), £        |                    |                                                |                    |                    | 0.246   |
| <18,000                                  | 1284 (34.9%)       | 1048 (34.5%)                                   | 202 (36.3%)        | 34 (39.5%)         |         |
| 18,000-30,999                            | 933 (25.4%)        | 777 (25.6%)                                    | 135 (24.3%)        | 21 (24.4%)         |         |
| 31,000-51,999                            | 566 (15.4%)        | 470 (15.5%)                                    | 82 (14.7%)         | 14 (16.3%)         |         |
| 52,000-100,000                           | 320 (8.7%)         | 265 (8.7%)                                     | 54 (9.7%)          | 1 (1.2%)           |         |
| >100,000                                 | 46 (1.3%)          | 43 (1.4%)                                      | 2 (0.4%)           | 1 (1.2%)           |         |
| Unknown                                  | 529 (14.4%)        | 433 (14.3%)                                    | 81 (14.6%)         | 15 (17.4%)         |         |
| Smoking status, n (%)                    |                    |                                                |                    |                    | 0.266   |
| Never                                    | 1456 (39.6%)       | 1228 (40.4%)                                   | 194 (34.9%)        | 34 (39.5%)         |         |
| Former                                   | 1794 (48.8%)       | 1464 (48.2%)                                   | 289 (52.0%)        | 41 (47.7%)         |         |
| Current                                  | 417 (11.3%)        | 336 (11.1%)                                    | 70 (12.6%)         | 11 (12.8%)         |         |

|                                             |                    |                    |                    |                    |        |
|---------------------------------------------|--------------------|--------------------|--------------------|--------------------|--------|
| Unknown                                     | 11 (0.3%)          | 8 (0.3%)           | 3 (0.5%)           | 0 (0.0%)           |        |
| Alcohol intake, median (IQR), g/day         | 8.5 (0.8 to 21.3)  | 8.5 (0.8 to 21.3)  | 8.5 (0.4 to 20.5)  | 6.2 (0.1 to 17.9)  | 0.360  |
| Healthy diet score, mean (SD)               | 3.0 (2.0 to 4.0)   | 3.0 (2.0 to 4.0)   | 3.0 (2.0 to 4.0)   | 3.0 (2.0 to 4.0)   | 0.962  |
| Physical activity, median (IQR), MET-h/week | 21.6 (7.9 to 47.5) | 21.5 (8.2 to 48.3) | 22.2 (7.8 to 44.7) | 18.6 (5.8 to 51.2) | 0.585  |
| Diabetes duration, n (%), years             |                    |                    |                    |                    | <0.001 |
| <1                                          | 605 (16.4%)        | 539 (17.8%)        | 60 (10.8%)         | 6 (7.0%)           |        |
| 1–4.9                                       | 1131 (30.8%)       | 970 (31.9%)        | 142 (25.5%)        | 19 (22.1%)         |        |
| 5–9.9                                       | 1043 (28.4%)       | 844 (27.8%)        | 171 (30.8%)        | 28 (32.6%)         |        |
| ≥10                                         | 899 (24.4%)        | 683 (22.5%)        | 183 (32.9%)        | 33 (38.4%)         |        |
| Diabetes medication use, n (%)              |                    |                    |                    |                    | <0.001 |
| None                                        | 1178 (32.0%)       | 1048 (34.5%)       | 121 (21.8%)        | 9 (10.5%)          |        |
| Only oral medication                        | 1904 (51.8%)       | 1560 (51.4%)       | 302 (54.3%)        | 42 (48.8%)         |        |
| Only insulin                                | 183 (5.0%)         | 130 (4.3%)         | 38 (6.8%)          | 15 (17.4%)         |        |
| Insulin and oral medication                 | 413 (11.2%)        | 298 (9.8%)         | 95 (17.1%)         | 20 (23.3%)         |        |
| HbA1c, n (%), mmol/mol                      |                    |                    |                    |                    | <0.001 |
| < 53.0                                      | 1965 (53.4%)       | 1685 (55.5%)       | 249 (44.8%)        | 31 (36.0%)         |        |
| ≥53.0                                       | 1471 (40.0%)       | 1148 (37.8%)       | 272 (48.9%)        | 51 (59.3%)         |        |
| Missing                                     | 242 (6.6%)         | 203 (6.7%)         | 35 (6.3%)          | 4 (4.7%)           |        |
| Antihypertensive medication use, n (%)      | 2570 (69.9%)       | 2085 (68.7%)       | 419 (75.4%)        | 66 (76.7%)         | 0.003  |
| Lipid-lowering treatment, n (%)             | 2901 (78.9%)       | 2366 (77.9%)       | 463 (83.3%)        | 72 (83.7%)         | 0.010  |
| Aspirin use, n (%)                          | 1931 (52.5%)       | 1561 (51.4%)       | 319 (57.4%)        | 51 (59.3%)         | 0.016  |
| No. of long-term conditions, n (%)          |                    |                    |                    |                    | 0.271  |
| 0                                           | 387 (10.5%)        | 338 (11.1%)        | 43 (7.7%)          | 6 (7.0%)           |        |
| 1                                           | 1042 (28.3%)       | 842 (27.7%)        | 172 (30.9%)        | 28 (32.6%)         |        |
| 2                                           | 1037 (28.2%)       | 867 (28.6%)        | 147 (26.4%)        | 23 (26.7%)         |        |
| 3                                           | 688 (18.7%)        | 557 (18.3%)        | 112 (20.1%)        | 19 (22.1%)         |        |
| 4                                           | 329 (8.9%)         | 270 (8.9%)         | 51 (9.2%)          | 8 (9.3%)           |        |
| ≥5                                          | 195 (5.3%)         | 162 (5.3%)         | 31 (5.6%)          | 2 (2.3%)           |        |

<sup>a</sup> Abbreviations: BMI, body mass index; HbA1c, glycated hemoglobin A1c; MET, metabolic equivalent; IQR, interquartile range; SD, standard deviation.

**Table S8. Association between frailty phenotype and risk of diabetic microvascular complications <sup>a</sup>.**

|                                            | Frailty phenotype |                   |                   | Per score increment | <i>P</i> trend |
|--------------------------------------------|-------------------|-------------------|-------------------|---------------------|----------------|
|                                            | Non-frail         | Pre-frail         | Frail             |                     |                |
| N                                          | 6101              | 10073             | 1888              |                     |                |
| <b>Overall microvascular complications</b> |                   |                   |                   |                     |                |
| Cases/person-years                         | 1067/69322        | 2031/110690       | 580/18701         |                     |                |
| Incident rate per 1000 person-years        | 15.39             | 18.35             | 31.01             |                     |                |
| Model 1                                    | 1.00 (reference)  | 1.21 (1.12, 1.30) | 2.08 (1.88, 2.31) | 1.25 (1.21, 1.28)   | <0.0001        |
| Model 2                                    | 1.00 (reference)  | 1.14 (1.06, 1.23) | 1.81 (1.62, 2.01) | 1.19 (1.16, 1.23)   | <0.0001        |
| Model 3                                    | 1.00 (reference)  | 1.10 (1.02, 1.19) | 1.61 (1.44, 1.79) | 1.15 (1.12, 1.19)   | <0.0001        |
| Model 4                                    | 1.00 (reference)  | 1.10 (1.02, 1.18) | 1.52 (1.36, 1.69) | 1.13 (1.10, 1.17)   | <0.0001        |
| <b>Nephropathy</b>                         |                   |                   |                   |                     |                |
| Cases/person-years                         | 588/71261         | 1235/114293       | 390/19609         |                     |                |
| Incident rate per 1000 person-years        | 8.25              | 10.81             | 19.89             |                     |                |
| Model 1                                    | 1.00 (reference)  | 1.34 (1.21, 1.48) | 2.46 (2.15, 2.80) | 1.32 (1.27, 1.37)   | <0.0001        |
| Model 2                                    | 1.00 (reference)  | 1.23 (1.11, 1.36) | 2.00 (1.75, 2.30) | 1.24 (1.19, 1.29)   | <0.0001        |
| Model 3                                    | 1.00 (reference)  | 1.16 (1.05, 1.28) | 1.67 (1.45, 1.92) | 1.17 (1.13, 1.22)   | <0.0001        |
| Model 4                                    | 1.00 (reference)  | 1.15 (1.04, 1.27) | 1.59 (1.38, 1.83) | 1.16 (1.11, 1.20)   | <0.0001        |
| <b>Retinopathy</b>                         |                   |                   |                   |                     |                |
| Cases/person-years                         | 481/71321         | 847/115116        | 192/20359         |                     |                |
| Incident rate per 1000 person-years        | 6.74              | 7.36              | 9.43              |                     |                |
| Model 1                                    | 1.00 (reference)  | 1.10 (0.98, 1.23) | 1.45 (1.22, 1.72) | 1.13 (1.08, 1.18)   | <0.0001        |
| Model 2                                    | 1.00 (reference)  | 1.06 (0.95, 1.19) | 1.36 (1.14, 1.62) | 1.11 (1.05, 1.16)   | <0.0001        |
| Model 3                                    | 1.00 (reference)  | 1.08 (0.96, 1.21) | 1.43 (1.20, 1.72) | 1.13 (1.07, 1.18)   | <0.0001        |
| Model 4                                    | 1.00 (reference)  | 1.08 (0.96, 1.21) | 1.32 (1.10, 1.58) | 1.10 (1.05, 1.16)   | 0.0003         |
| <b>Neuropathy</b>                          |                   |                   |                   |                     |                |
| Cases/person-years                         | 168/72602         | 366/117089        | 139/20451         |                     |                |

| Incident rate per 1000 person-years | 2.31             | 3.13              | 6.8               |                   |         |
|-------------------------------------|------------------|-------------------|-------------------|-------------------|---------|
| Model 1                             | 1.00 (reference) | 1.34 (1.11, 1.61) | 2.79 (2.21, 3.53) | 1.36 (1.27, 1.45) | <0.0001 |
| Model 2                             | 1.00 (reference) | 1.26 (1.04, 1.51) | 2.41 (1.90, 3.06) | 1.30 (1.21, 1.39) | <0.0001 |
| Model 3                             | 1.00 (reference) | 1.19 (0.99, 1.43) | 2.00 (1.57, 2.56) | 1.23 (1.14, 1.32) | <0.0001 |
| Model 4                             | 1.00 (reference) | 1.19 (0.99, 1.44) | 1.87 (1.46, 2.39) | 1.20 (1.12, 1.29) | <0.0001 |

<sup>a</sup> Model 1 adjusted for age (continuous), sex (male or female), ethnicity (White, Mixed, Asian, Black, Chinese, others, or unknown), educational attainment (college or university, vocational, upper secondary, lower secondary, others, or unknown), Townsend deprivation index (in quintiles), annual household income (<18000, 18000–30999, 31000–51999, 52000–100000, or >100000£ per year), and assessment centers (22 categories).

Model 2 adjusted for Model 1 plus smoking status (ever, former, or current smokers), alcohol intake (0, 0.1–4.9, 5.0–14.9, 15.0–19.9, 20.0–29.9, or ≥30.0 g/day), healthy diet score (in quintiles), BMI (<18.5, 18.5–24.9, 25.0–29.9, 30.0–34.9, or ≥35.0 kg/m<sup>2</sup>).

Model 3 adjusted for Model 2 plus No. of long-term conditions (0, 1, 2, 3, 4, and ≥5).

Model 4 adjusted for Model 3 plus Diabetes duration (<1, 1–4, 5–9, ≥10 years), HbA1c (<53, ≥53 mmol/mol, missing), diabetes medication use (none, only oral medication, only insulin, or insulin and oral medication), lipid-lowering treatment, antihypertensive medication use, and aspirin use.

**Table S9. Prevalence of Frailty Phenotype Components in Percentages.**

|                       | Overall      | Frailty phenotype |              |              |
|-----------------------|--------------|-------------------|--------------|--------------|
|                       |              | Non-frail         | Pre-frail    | Frail        |
| N                     | 18062        | 6101(33.8%)       | 10073(55.8%) | 1888(10.4%)  |
| Weight loss           | 4843 (26.8%) | 0 (0.0%)          | 3955 (39.3%) | 888 (47.0%)  |
| Exhaustion            | 3226 (17.9%) | 0 (0.0%)          | 2031 (20.2%) | 1195 (63.3%) |
| Low physical activity | 3607 (20.0%) | 0 (0.0%)          | 2347 (23.3%) | 1260 (66.7%) |
| Slow gait speed       | 3487 (19.3%) | 0 (0.0%)          | 1952 (19.4%) | 1535 (81.3%) |
| Low grip strength     | 4500 (24.9%) | 0 (0.0%)          | 3165 (31.4%) | 1335 (70.7%) |

**Table S10. Association between Frailty Components and risk of diabetic microvascular complications <sup>a</sup>.**

|                                            | Model 1           | Model 2           | Model 3           | Model 4           | Model 5           |
|--------------------------------------------|-------------------|-------------------|-------------------|-------------------|-------------------|
| <b>Overall microvascular complications</b> |                   |                   |                   |                   |                   |
| Weight loss                                | 0.95 (0.88, 1.03) | 0.96 (0.89, 1.03) | 0.96 (0.89, 1.03) | 0.99 (0.92, 1.07) | 1.00 (0.93, 1.08) |
| Exhaustion                                 | 1.40 (1.29, 1.52) | 1.32 (1.21, 1.43) | 1.21 (1.11, 1.31) | 1.17 (1.07, 1.27) | 1.11 (1.02, 1.21) |
| Low physical activity                      | 1.37 (1.27, 1.47) | 1.26 (1.16, 1.36) | 1.21 (1.12, 1.31) | 1.18 (1.10, 1.28) | 1.09 (1.01, 1.18) |
| Slow gait speed                            | 1.81 (1.68, 1.95) | 1.60 (1.48, 1.73) | 1.47 (1.36, 1.59) | 1.42 (1.31, 1.54) | 1.37 (1.26, 1.48) |
| Low grip strength                          | 1.27 (1.18, 1.37) | 1.22 (1.13, 1.31) | 1.18 (1.09, 1.27) | 1.12 (1.04, 1.21) | 1.08 (1.00, 1.16) |
| <b>Nephropathy</b>                         |                   |                   |                   |                   |                   |
| Weight loss                                | 0.95 (0.86, 1.05) | 0.96 (0.87, 1.06) | 0.96 (0.87, 1.06) | 0.97 (0.88, 1.07) | 0.98 (0.89, 1.08) |
| Exhaustion                                 | 1.58 (1.43, 1.76) | 1.45 (1.31, 1.61) | 1.27 (1.14, 1.41) | 1.25 (1.12, 1.39) | 1.18 (1.06, 1.31) |
| Low physical activity                      | 1.49 (1.36, 1.64) | 1.31 (1.19, 1.45) | 1.24 (1.13, 1.37) | 1.22 (1.11, 1.35) | 1.11 (1.00, 1.23) |
| Slow gait speed                            | 2.13 (1.94, 2.33) | 1.78 (1.62, 1.96) | 1.56 (1.41, 1.72) | 1.51 (1.37, 1.67) | 1.44 (1.30, 1.60) |
| Low grip strength                          | 1.28 (1.16, 1.40) | 1.21 (1.10, 1.33) | 1.15 (1.04, 1.26) | 1.11 (1.01, 1.22) | 1.05 (0.96, 1.16) |
| <b>Retinopathy</b>                         |                   |                   |                   |                   |                   |
| Weight loss                                | 0.92 (0.82, 1.04) | 0.91 (0.81, 1.02) | 0.91 (0.81, 1.03) | 1.00 (0.89, 1.12) | 1.01 (0.89, 1.13) |
| Exhaustion                                 | 1.16 (1.02, 1.32) | 1.14 (0.99, 1.30) | 1.17 (1.02, 1.34) | 1.09 (0.95, 1.25) | 1.06 (0.92, 1.21) |
| Low physical activity                      | 1.21 (1.07, 1.37) | 1.18 (1.04, 1.34) | 1.19 (1.05, 1.35) | 1.14 (1.01, 1.29) | 1.09 (0.96, 1.24) |
| Slow gait speed                            | 1.28 (1.13, 1.45) | 1.23 (1.08, 1.40) | 1.27 (1.12, 1.45) | 1.19 (1.05, 1.36) | 1.14 (0.99, 1.31) |
| Low grip strength                          | 1.31 (1.17, 1.47) | 1.27 (1.13, 1.43) | 1.29 (1.15, 1.45) | 1.20 (1.07, 1.35) | 1.18 (1.05, 1.33) |
| <b>Neuropathy</b>                          |                   |                   |                   |                   |                   |
| Weight loss                                | 1.09 (0.92, 1.29) | 1.09 (0.92, 1.29) | 1.09 (0.92, 1.29) | 1.15 (0.97, 1.37) | 1.17 (0.98, 1.39) |
| Exhaustion                                 | 1.66 (1.39, 1.98) | 1.56 (1.30, 1.86) | 1.36 (1.13, 1.63) | 1.30 (1.08, 1.56) | 1.20 (1.00, 1.44) |
| Low physical activity                      | 1.32 (1.11, 1.58) | 1.21 (1.01, 1.44) | 1.13 (0.94, 1.35) | 1.09 (0.91, 1.30) | 0.94 (0.78, 1.13) |

|                   |                   |                   |                   |                   |                   |
|-------------------|-------------------|-------------------|-------------------|-------------------|-------------------|
| Slow gait speed   | 2.44 (2.07, 2.87) | 2.13 (1.79, 2.52) | 1.86 (1.56, 2.22) | 1.79 (1.50, 2.13) | 1.77 (1.47, 2.12) |
| Low grip strength | 1.27 (1.07, 1.50) | 1.22 (1.03, 1.45) | 1.16 (0.97, 1.38) | 1.09 (0.91, 1.29) | 1.02 (0.86, 1.21) |

<sup>a</sup> Model 1 adjusted for age (continuous), sex (male or female), ethnicity (White, Mixed, Asian, Black, Chinese, others, or unknown), educational attainment (college or university, vocational, upper secondary, lower secondary, others, or unknown), Townsend deprivation index (in quintiles), annual household income (<18000, 18000–30999, 31000–51999, 52000–100000, or >100000£ per year), and assessment centers (22 categories).

Model 2 adjusted for Model 1 plus smoking status (ever, former, or current smokers), alcohol intake (0, 0.1–4.9, 5.0–14.9, 15.0–19.9, 20.0–29.9, or ≥30.0 g/day), healthy diet score (in quintiles), BMI (<18.5, 18.5–24.9, 25.0–29.9, 30.0–34.9, or ≥35.0 kg/m<sup>2</sup>).

Model 3 adjusted for Model 2 plus No. of long-term conditions (0, 1, 2, 3, 4, and ≥5).

Model 4 adjusted for Model 3 plus Diabetes duration (<1, 1–4, 5–9, ≥10 years), HbA1c (<53, ≥53 mmol/mol, missing), diabetes medication use (none, only oral medication, only insulin, or insulin and oral medication), lipid-lowering treatment, antihypertensive medication use, and aspirin use at baseline.

Model 5 further mutually adjusted for other frailty components.



**Table S11. Association between frailty and risk of overall diabetic microvascular complications by subgroups <sup>a</sup>.**

|                                       | N     | Frailty phenotype |                   |                   | P for interaction |
|---------------------------------------|-------|-------------------|-------------------|-------------------|-------------------|
|                                       |       | Non-frail         | Pre-frail         | Frail             |                   |
| <b>Baseline Age, years</b>            |       |                   |                   |                   | 0.6454            |
| < 60                                  | 7575  | 1.00 (reference)  | 1.11 (0.96, 1.28) | 1.58 (1.29, 1.94) |                   |
| ≥ 60                                  | 10487 | 1.00 (reference)  | 1.09 (1.00, 1.19) | 1.51 (1.32, 1.72) |                   |
| <b>Sex</b>                            |       |                   |                   |                   | 0.8697            |
| Female                                | 6751  | 1.00 (reference)  | 1.10 (0.95, 1.26) | 1.63 (1.36, 1.95) |                   |
| Male                                  | 11311 | 1.00 (reference)  | 1.10 (1.00, 1.20) | 1.45 (1.26, 1.67) |                   |
| <b>Education</b>                      |       |                   |                   |                   | 0.5070            |
| College or university                 | 4855  | 1.00 (reference)  | 1.14 (0.97, 1.32) | 1.68 (1.31, 2.16) |                   |
| Below college                         | 12992 | 1.00 (reference)  | 1.08 (0.99, 1.18) | 1.47 (1.3, 1.66)  |                   |
| <b>Townsend deprivation index</b>     |       |                   |                   |                   | 0.0827            |
| Below median value (low deprivation)  | 9018  | 1.00 (reference)  | 1.15 (1.03, 1.28) | 1.75 (1.49, 2.07) |                   |
| Above median value (high deprivation) | 9018  | 1.00 (reference)  | 1.04 (0.93, 1.16) | 1.37 (1.18, 1.58) |                   |
| <b>Annual household income, £</b>     |       |                   |                   |                   | 0.0844            |
| <31,000                               | 9483  | 1.00 (reference)  | 1.01 (0.91, 1.12) | 1.42 (1.24, 1.62) |                   |
| ≥31,000                               | 6158  | 1.00 (reference)  | 1.21 (1.05, 1.40) | 1.64 (1.26, 2.13) |                   |
| <b>Smoking status</b>                 |       |                   |                   |                   | 0.5720            |
| Never                                 | 7949  | 1.00 (reference)  | 1.11 (0.98, 1.25) | 1.48 (1.24, 1.77) |                   |
| Former                                | 8029  | 1.00 (reference)  | 1.07 (0.96, 1.19) | 1.58 (1.35, 1.85) |                   |
| Current                               | 2008  | 1.00 (reference)  | 1.18 (0.92, 1.51) | 1.48 (1.07, 2.05) |                   |
| <b>Healthy diet score</b>             |       |                   |                   |                   | 0.1687            |
| Low                                   | 5445  | 1.00 (reference)  | 1.08 (0.93, 1.24) | 1.37 (1.12, 1.68) |                   |
| Middle                                | 4437  | 1.00 (reference)  | 1.10 (0.95, 1.28) | 1.54 (1.24, 1.91) |                   |
| Hight                                 | 7734  | 1.00 (reference)  | 1.13 (1.00, 1.27) | 1.64 (1.38, 1.95) |                   |
| <b>BMI, kg/m2</b>                     |       |                   |                   |                   | 0.9048            |
| <30                                   | 8322  | 1.00 (reference)  | 1.13 (1.01, 1.26) | 1.47 (1.20, 1.80) |                   |
| ≥30                                   | 9740  | 1.00 (reference)  | 1.09 (0.98, 1.21) | 1.59 (1.39, 1.82) |                   |
| <b>Diabetes duration, years</b>       |       |                   |                   |                   | 0.8031            |

|                                    |       |                  |                   |                   |        |
|------------------------------------|-------|------------------|-------------------|-------------------|--------|
| <1                                 | 4757  | 1.00 (reference) | 1.03 (0.85, 1.24) | 1.66 (1.26, 2.18) |        |
| 1–4.9                              | 6152  | 1.01 (reference) | 1.07 (0.93, 1.22) | 1.38 (1.13, 1.69) |        |
| 5–9.9                              | 4408  | 1.00 (reference) | 1.16 (1.00, 1.34) | 1.66 (1.34, 2.04) |        |
| ≥10                                | 2745  | 1.01 (reference) | 1.14 (0.97, 1.33) | 1.46 (1.16, 1.83) |        |
| <b>Diabetes medication use</b>     |       |                  |                   |                   | 0.3402 |
| None                               | 8192  | 1.01 (reference) | 1.03 (0.9, 1.17)  | 1.31 (1.06, 1.6)  |        |
| Only oral medication               | 8093  | 1.00 (reference) | 1.07 (0.96, 1.2)  | 1.65 (1.42, 1.92) |        |
| Insulin                            | 1777  | 1.00 (reference) | 1.35 (1.10, 1.65) | 1.48 (1.12, 1.95) |        |
| <b>HbA1c, mmol/mol</b>             |       |                  |                   |                   | 0.9472 |
| < 53.0                             | 11019 | 1.00 (reference) | 1.06 (0.96, 1.18) | 1.49 (1.27, 1.73) |        |
| ≥ 53.0                             | 5980  | 1.00 (reference) | 1.14 (1.01, 1.29) | 1.46 (1.23, 1.74) |        |
| <b>No. of long-term conditions</b> |       |                  |                   |                   | 0.5334 |
| 0                                  | 2853  | 1.00 (reference) | 1.18 (0.95, 1.47) | 1.14 (0.67, 1.95) |        |
| 1                                  | 6084  | 1.00 (reference) | 1.09 (0.95, 1.25) | 1.44 (1.13, 1.83) |        |
| 2                                  | 4874  | 1.01 (reference) | 1.01 (0.88, 1.17) | 1.49 (1.21, 1.83) |        |
| ≥3                                 | 4251  | 1.00 (reference) | 1.18 (1.01, 1.38) | 1.66 (1.39, 1.99) |        |

<sup>a</sup> Cox proportional hazards models adjusted for age (continuous), sex (male or female), ethnicity (White, Mixed, Asian, Black, Chinese, others, or unknown), educational attainment (college or university, vocational, upper secondary, lower secondary, others, or unknown), Townsend deprivation index (in quintiles), annual household income (<18000, 18000–30999, 31000–51999, 52000–100000, or >100000£ per year), assessment centers (22 categories), smoking status (ever, former, or current smokers), alcohol intake (0, 0.1–4.9, 5.0–14.9, 15.0–19.9, 20.0–29.9, or ≥30.0 g/day), healthy diet score (in quintiles), BMI (<18.5, 18.5–24.9, 25.0–29.9, 30.0–34.9, or ≥35.0 kg/m<sup>2</sup>), No. of long-term conditions (0, 1, 2, 3, 4, and ≥5), diabetes duration (<1, 1–4, 5–9, ≥10 years), HbA1c (<53, ≥53 mmol/mol, missing), diabetes medication use (none, only oral medication, only insulin, or insulin and oral medication), lipid-lowering treatment, antihypertensive medication use, and aspirin use. Each of the else groups were adjusted for all covariates except itself.

**Table S12. Sensitivity analyses of association between frailty phenotype and risk of diabetic microvascular complications (exclude individuals diagnosed any microvascular complications within 2 years of follow-up) <sup>a</sup>**

|                                              | Frailty phenotype |                   |                   | Per score increment | <i>P</i> trend |
|----------------------------------------------|-------------------|-------------------|-------------------|---------------------|----------------|
|                                              | Non-frail         | Pre-frail         | Frail             |                     |                |
| N                                            | 6013              | 9888              | 1808              |                     |                |
| <b>Overall microvascular complications</b>   |                   |                   |                   |                     |                |
| Cases/person-years                           | 1034/69040        | 1945/110587       | 536/18698         |                     |                |
| Incident rate per 1000 person-years          | 14.98             | 17.59             | 28.67             |                     |                |
| Hazard ratio (95% CI)                        | 1.00 (reference)  | 1.08 (1.00, 1.17) | 1.45 (1.30, 1.63) | 1.12 (1.08, 1.15)   | <0.0001        |
| <b>Nephropathy</b>                           |                   |                   |                   |                     |                |
| Cases/person-years                           | 573/70767         | 1185/113728       | 360/19426         |                     |                |
| Incident rate per 1000 person-years          | 8.1               | 10.42             | 18.53             |                     |                |
| Hazard ratio (95% CI)                        | 1.00 (reference)  | 1.13 (1.02, 1.25) | 1.53 (1.33, 1.77) | 1.14 (1.09, 1.19)   | <0.0001        |
| <b>Retinopathy</b>                           |                   |                   |                   |                     |                |
| Cases/person-years                           | 462/70927         | 795/114672        | 182/20087         |                     |                |
| Incident rate per 1000 person-years          | 6.51              | 6.93              | 9.06              |                     |                |
| Hazard ratio (95% CI)                        | 1.00 (reference)  | 1.05 (0.93, 1.18) | 1.31 (1.09, 1.57) | 1.09 (1.04, 1.15)   | 0.0010         |
| <b>Neuropathy</b>                            |                   |                   |                   |                     |                |
| Cases/person-years                           | 162/72060         | 335/116452        | 122/20203         |                     |                |
| Incident rate per 1000 person-years (95% CI) | 2.25              | 2.88              | 6.04              |                     |                |
| Hazard ratio (95% CI)                        | 1.00 (reference)  | 1.12 (0.93, 1.36) | 1.71 (1.32, 2.21) | 1.17 (1.09, 1.26)   | <0.0001        |

<sup>a</sup> Exclusion of 353 individuals who diagnosed overall microvascular complications or died within 2 years of follow-up. Hazard ratios were adjusted for age (continuous), sex (male or female), ethnicity (White, Mixed, Asian, Black, Chinese, others, or unknown), educational attainment (college or university, vocational, upper secondary, lower secondary, others, or unknown), Townsend deprivation index (in quintiles), annual household income (<18000, 18000–30999, 31000–51999, 52000–100000, or >100000£ per year), assessment centers (22 categories), smoking status (ever, former, or current smokers), alcohol intake (0, 0.1–4.9, 5.0–14.9, 15.0–19.9, 20.0–29.9, or ≥30.0 g/day), healthy diet score (in quintiles), BMI (<18.5, 18.5–24.9, 25.0–29.9, 30.0–34.9, or ≥35.0 kg/m<sup>2</sup>), No. of long-term conditions (0, 1, 2, 3, 4, and ≥5), diabetes duration (<1, 1–4, 5–9, ≥10 years), HbA1c (<53, ≥53 mmol/mol, missing), diabetes medication use (none, only oral medication, only insulin, or insulin and oral medication), lipid-lowering treatment, antihypertensive medication use, and aspirin use.

**Table S13. Sensitivity analyses of association between frailty phenotype and risk of overall diabetic microvascular complications by sequentially adjusting for lipid profile, MAP, eGFR <sup>a</sup>**

|                                            | Frailty phenotype |                   |                   | Per score increment | <i>P</i> trend |
|--------------------------------------------|-------------------|-------------------|-------------------|---------------------|----------------|
|                                            | Non-frail         | Pre-frail         | Frail             |                     |                |
| N                                          | 6101              | 10073             | 1888              |                     |                |
| <b>Overall microvascular complications</b> |                   |                   |                   |                     |                |
| Model 4 + lipid profiles                   | 1.00 (reference)  | 1.09 (1.01, 1.18) | 1.50 (1.35, 1.68) | 1.13 (1.09, 1.17)   | <0.0001        |
| Model 4 + lipid profiles + MAP             | 1.00 (reference)  | 1.08 (1.00, 1.17) | 1.49 (1.33, 1.66) | 1.13 (1.09, 1.16)   | <0.0001        |
| Model 4 + lipid profiles + MAP + eGFR      | 1.00 (reference)  | 1.08 (1.00, 1.16) | 1.41 (1.26, 1.58) | 1.11 (1.07, 1.14)   | <0.0001        |
| <b>Nephropathy</b>                         |                   |                   |                   |                     |                |
| Model 4 + lipid profiles                   | 1.00 (reference)  | 1.14 (1.03, 1.26) | 1.57 (1.37, 1.81) | 1.15 (1.11, 1.20)   | <0.0001        |
| Model 4 + lipid profiles + MAP             | 1.00 (reference)  | 1.13 (1.02, 1.24) | 1.54 (1.34, 1.77) | 1.15 (1.10, 1.19)   | <0.0001        |
| Model 4 + lipid profiles + MAP + eGFR      | 1.00 (reference)  | 1.11 (1.01, 1.23) | 1.39 (1.21, 1.60) | 1.11 (1.06, 1.15)   | <0.0001        |
| <b>Retinopathy</b>                         |                   |                   |                   |                     |                |
| Model 4 + lipid profiles                   | 1.00 (reference)  | 1.07 (0.96, 1.20) | 1.31 (1.09, 1.57) | 1.10 (1.04, 1.15)   | 0.0004         |
| Model 4 + lipid profiles + MAP             | 1.00 (reference)  | 1.08 (0.96, 1.21) | 1.32 (1.10, 1.59) | 1.10 (1.05, 1.16)   | 0.0002         |
| Model 4 + lipid profiles + MAP + eGFR      | 1.00 (reference)  | 1.08 (0.96, 1.21) | 1.31 (1.09, 1.58) | 1.10 (1.04, 1.16)   | 0.0004         |
| <b>Neuropathy</b>                          |                   |                   |                   |                     |                |
| Model 4 + lipid profiles                   | 1.00 (reference)  | 1.19 (0.98, 1.43) | 1.85 (1.45, 2.37) | 1.20 (1.12, 1.29)   | <0.0001        |
| Model 4 + lipid profiles + MAP             | 1.00 (reference)  | 1.18 (0.98, 1.42) | 1.83 (1.43, 2.34) | 1.19 (1.11, 1.28)   | <0.0001        |
| Model 4 + lipid profiles + MAP + eGFR      | 1.00 (reference)  | 1.17 (0.97, 1.41) | 1.80 (1.40, 2.31) | 1.19 (1.10, 1.27)   | <0.0001        |

<sup>a</sup> Sensitivity analyses were conducted by sequentially adjusting for lipid profiles (total cholesterol [TC], low-density lipoprotein [LDL], cholesterol and high-density lipoprotein [HDL] cholesterol, triglycerides [TG]), Mean arterial pressure (MAP), and estimated glomerular filtration rate (eGFR) at baseline based on Model 4.

Model 4, adjusted for age (continuous), sex (male or female), ethnicity (White, Mixed, Asian, Black, Chinese, others, or unknown), educational attainment (college or university, vocational, upper secondary, lower secondary, others, or unknown), Townsend deprivation index (in quintiles), annual household income (<18000, 18000–30999, 31000–51999, 52000–100000, or >100000£ per year), assessment centers (22 categories), smoking status (ever, former, or current smokers), alcohol intake (0, 0.1–4.9, 5.0–14.9, 15.0–19.9, 20.0–29.9, or ≥30.0 g/day), healthy

diet score (in quintiles), BMI (<18.5, 18.5–24.9, 25.0–29.9, 30.0–34.9, or  $\geq 35.0$  kg/m<sup>2</sup>), No. of long-term conditions (0, 1, 2, 3, 4, and  $\geq 5$ ), diabetes duration (<1, 1–4, 5–9,  $\geq 10$  years), HbA1c (<53,  $\geq 53$  mmol/mol, missing), diabetes medication use (none, only oral medication, only insulin, or insulin and oral medication), lipid-lowering treatment, antihypertensive medication use, and aspirin use.

**Table S14. Association between frailty phenotype and risk of overall diabetic microvascular complications using Fine & Gray models for competing risk <sup>a</sup>**

|                                            | Frailty phenotype |                   |                   | Per score increment | <i>P</i> trend |
|--------------------------------------------|-------------------|-------------------|-------------------|---------------------|----------------|
|                                            | Non-frail         | Pre-frail         | Frail             |                     |                |
| N                                          | 6101              | 10073             | 1888              |                     |                |
| <b>Overall microvascular complications</b> | 1.00 (reference)  | 1.06 (0.99, 1.15) | 1.41 (1.26, 1.57) | 1.11 (1.07, 1.14)   | <0.0001        |
| <b>Nephropathy</b>                         | 1.00 (reference)  | 1.11 (1.01, 1.23) | 1.47 (1.27, 1.70) | 1.13 (1.08, 1.18)   | <0.0001        |
| <b>Retinopathy</b>                         | 1.00 (reference)  | 1.05 (0.93, 1.18) | 1.22 (1.01, 1.47) | 1.07 (1.02, 1.13)   | 0.0089         |
| <b>Neuropathy</b>                          | 1.00 (reference)  | 1.15 (0.95, 1.38) | 1.71 (1.33, 2.19) | 1.16 (1.08, 1.25)   | <0.0001        |

<sup>a</sup> Cox proportional hazards models adjusted for age (continuous), sex (male or female), ethnicity (White, Mixed, Asian, Black, Chinese, others, or unknown), educational attainment (college or university, vocational, upper secondary, lower secondary, others, or unknown), Townsend deprivation index (in quintiles), annual household income (<18000, 18000–30999, 31000–51999, 52000–100000, or >100000£ per year), assessment centers (22 categories), smoking status (ever, former, or current smokers), alcohol intake (0, 0.1–4.9, 5.0–14.9, 15.0–19.9, 20.0–29.9, or ≥30.0 g/day), healthy diet score (in quintiles), BMI (<18.5, 18.5–24.9, 25.0–29.9, 30.0–34.9, or ≥35.0 kg/m<sup>2</sup>), No. of long-term conditions (0, 1, 2, 3, 4, and ≥5), diabetes duration (<1, 1–4, 5–9, ≥10 years), HbA1c (<53, ≥53 mmol/mol, missing), diabetes medication use (none, only oral medication, only insulin, or insulin and oral medication), lipid-lowering treatment, antihypertensive medication use, and aspirin use at baseline.

**Table S15. Sensitivity analyses of association between frailty phenotype and risk of diabetic microvascular complications were conducted by using the Charlson comorbidity index as an alternative measure of comorbidities <sup>a</sup>.**

|                                            | Frailty phenotype |                   |                   | Per score increment | <i>P</i> trend |
|--------------------------------------------|-------------------|-------------------|-------------------|---------------------|----------------|
|                                            | Non-frail         | Pre-frail         | Frail             |                     |                |
| N                                          | 6101              | 10073             | 1888              |                     |                |
| <b>Overall microvascular complications</b> | 1.00 (reference)  | 1.10 (1.02, 1.18) | 1.52 (1.37, 1.7)  | 1.13 (1.10, 1.17)   | <0.0001        |
| <b>Nephropathy</b>                         | 1.00 (reference)  | 1.15 (1.04, 1.27) | 1.58 (1.38, 1.82) | 1.15 (1.11, 1.20)   | <0.0001        |
| <b>Retinopathy</b>                         | 1.00 (reference)  | 1.06 (0.95, 1.19) | 1.27 (1.06, 1.52) | 1.09 (1.03, 1.14)   | 0.0011         |
| <b>Neuropathy</b>                          | 1.00 (reference)  | 1.22 (1.01, 1.47) | 1.99 (1.56, 2.54) | 1.22 (1.14, 1.31)   | <0.0001        |

<sup>a</sup> Cox proportional hazards models adjusted for age (continuous), sex (male or female), ethnicity (White, Mixed, Asian, Black, Chinese, others, or unknown), educational attainment (college or university, vocational, upper secondary, lower secondary, others, or unknown), Townsend deprivation index (in quintiles), annual household income (<18000, 18000–30999, 31000–51999, 52000–100000, or >100000£ per year), assessment centers (22 categories), smoking status (ever, former, or current smokers), alcohol intake (0, 0.1–4.9, 5.0–14.9, 15.0–19.9, 20.0–29.9, or ≥30.0 g/day), healthy diet score (in quintiles), BMI (<18.5, 18.5–24.9, 25.0–29.9, 30.0–34.9, or ≥35.0 kg/m<sup>2</sup>), Charlson comorbidity index (0, 1, 2, and ≥3), diabetes duration (<1, 1–4, 5–9, ≥10 years), HbA1c (<53, ≥53 mmol/mol, missing), diabetes medication use (none, only oral medication, only insulin, or insulin and oral medication), lipid-lowering treatment, antihypertensive medication use, and aspirin use at baseline.

**Table S16. Mediating effects of multimorbidity on the association of Frailty Phenotype with risk of diabetic microvascular complications among type 2 diabetes <sup>a</sup>.**

|                                     | Total effect      | Direct effect     | Proportion mediated   | P value |
|-------------------------------------|-------------------|-------------------|-----------------------|---------|
| <b>No. of long-term conditions</b>  |                   |                   |                       |         |
| Overall microvascular complications | 1.15 (1.11, 1.19) | 1.19 (1.15, 1.23) | 19.8% (14.5%, 26.5%)  | <0.0001 |
| Nephropathy                         | 1.18 (1.13, 1.23) | 1.24 (1.19, 1.29) | 23.3% (17.3%, 30.5%)  | <0.0001 |
| Retinopathy                         | —*                | —                 | —                     | —       |
| Neuropathy                          | 1.22 (1.14, 1.31) | 1.30 (1.21, 1.39) | 24.2% (15.8%, 35.1 %) | <0.0001 |
| <b>Charlson comorbidity index</b>   |                   |                   |                       |         |
| Overall microvascular complications | 1.16 (1.12, 1.20) | 1.19 (1.15, 1.23) | 13.1% (9.7%, 17.5%)   | <0.0001 |
| Nephropathy                         | 1.20 (1.15, 1.25) | 1.24 (1.19, 1.29) | 15.7% (11.8%, 20.5%)  | <0.0001 |
| Retinopathy                         | —                 | —                 | —                     | —       |
| Neuropathy                          | 1.26 (1.17, 1.35) | 1.30 (1.21, 1.39) | 12.2% (7.6%, 19.0 %)  | <0.0001 |

<sup>a</sup> Data are HR (95% CI) or %; Mediation analyses were used. The covariates adjusted for in the mediation analyses included age, sex, ethnicity, educational attainment, Townsend deprivation index, annual household income, assessment centers, smoking status, alcohol intake, healthy diet score, BMI, diabetes duration, HbA1c, diabetes medication use, lipid-lowering treatment, antihypertensive medication use, and aspirin use.

\*— means that the mediator was not intermediate to VPA proportion and outcome.
